# Supplementary material for: A retrospective analysis of a newly proposed imaging-etiologic classification for acute ischemic stroke with large vascular occlusion based on MRI and pathogenesis
Source: PeerJ. 2024 Oct 24;12:e18342. doi: 10.7717/peerj.18342 (PMC11512804; doi:10.7717/peerj.18342)
Supplement: Supplemental Information 3 — Detailed information on patients who underwent endovascular treatment (EVT) for cerebral infarction. [file peerj-12-18342-s003.xlsx]

## Sheet: Sheet1
Gender	Age	Name of the Surgery	Non-Visible Cerebral Vascular Segments on MRA	Patient Subtyping in the Newly Proposed Imaging-Etiologic Classification System Based on MRI (DWI & MRA) and Medical History	EVT Surgery Findings Concordance with Imaging-Etiologic Classification (Y/N) ＆ Identifying the Specific Segment of Cerebral Vascular Occlusion	Pathogenesis Concordance with Pre-judgment (Y/N)＆Identifying the Exact Pathogenesis	Onset Time of Cerebral Infarction（Hours）	Special Medical History
Male	53	Thrombectomy with Stent Retriever	6	Ⅰ-3	Y＆Distal basilar artery(BA)	Y	2	Atrial fibrillation
Male	65	Thrombectomy with Stent Retriever+Basilar Artery Balloon Angioplasty with Stent Placement	7	Ⅱ-2	Y＆Mid-proximal BA	Y	1.5
Male	53	Thrombus Aspiration	6	Ⅲ-2	Y＆Intracranial vertebral artery(V4)	Y	8
Female	80	Thrombus Aspiration	6	Ⅰ-3	Y＆Distal BA	Y	15
Male	54	Thrombus Aspiration+Thrombectomy with Stent Retriever	6	Ⅰ-3	Y＆Distal BA	Y	4	Tumor chemotherapy
Female	75	Thrombectomy with Stent Retriever	6	Ⅰ-3	Y＆Distal BA	Y	1.5	Atrial fibrillation
Female	75	Thrombus Aspiration	7	Ⅳ-2	N＆Distal BA	N＆Thrombotic stroke	9
Male	73	Thrombus Aspiration	6	Ⅰ-3	Y＆Distal BA	Y	1	Atrial fibrillation
Male	66	Thrombectomy with Stent Retriever+Basilar Artery Balloon Angioplasty with Stent Placement	6	Ⅱ-2	Y＆Mid-proximal BA	Y	48
Male	45	Thrombectomy with Stent Retriever	7	Ⅱ-2	Y＆Mid-proximal BA	Y	4
Male	55	Thrombectomy with Stent Retriever+Basilar Artery Balloon Angioplasty with Stent Placement	7	Ⅱ-2	Y＆Mid-proximal BA	Y	18
Female	68	Thrombectomy with Stent Retriever+Basilar Artery Balloon Angioplasty	6	Ⅰ-3	N＆Mid-proximal BA	N＆Large artery atherosclerosis (LAA)	5
Male	50	Thrombectomy with Stent Retriever+Basilar Artery Balloon Angioplasty with Stent Placement	7	Ⅱ-2	Y＆Mid-proximal BA	Y	1
Male	45	Thrombectomy with Stent Retriever+Basilar Artery Balloon Angioplasty with Stent Placement	7	Ⅱ-2	Y＆Mid-proximal BA	Y	2
Male	70	Thrombectomy with Stent Retriever+Basilar Artery Balloon Angioplasty with Stent Placement	7	Ⅱ-2	Y＆Mid-proximal BA	Y	4	History of cerebral infarction
Male	63	Thrombectomy with Stent Retriever+Basilar/Vertebral Artery Balloon Angioplasty	7	Ⅲ-2	Y＆V4	Y	4
Male	63	Thrombectomy with Stent Retriever+Basilar/Vertebral Artery Balloon Angioplasty	7	Ⅲ-2	Y ＆V4	Y	3
Male	55	Thrombectomy with Stent Retriever+Basilar/Vertebral Artery Balloon Angioplasty	7	Ⅲ-2	Y ＆V4	Y	11
Male	57	Thrombectomy with Stent Retriever	6	Ⅲ-2	Y＆V4	Y	1
Female	63	Thrombus Aspiration+Basilar/Vertebral Artery Balloon Angioplasty	7	Ⅲ-2	Y＆V4	Y	8
Male	47	Thrombectomy with Stent Retriever+Basilar/Vertebral Artery Balloon Angioplasty with Stent Placement	7	Ⅲ-2	Y＆V4	Y	18
Male	34	Thrombectomy with Stent Retriever+Basilar/Vertebral Artery Balloon Angioplasty with Stent Placement	7	Ⅲ-2	Y＆V4	Y	10
Female	55	Basilar/Vertebral Artery Balloon Angioplasty with Stent Placement	8	Ⅲ-2	Y＆V4	Y	24
Male	58	Thrombectomy with Stent Retriever+Basilar/Vertebral Artery Balloon Angioplasty	8	Ⅲ-2	Y＆V4	Y	24
Male	58	Thrombus Aspiration+Basilar/Vertebral Artery Balloon Angioplasty	8	Ⅲ-2	Y＆V4	Y	7
Female	78	Thrombectomy with Stent Retriever	8	Ⅲ-2	Y＆V4	Y	1.5
Male	58	Thrombectomy with Stent Retriever+Basilar/Vertebral Artery Balloon Angioplasty with Stent Placement	7	Ⅲ-2	Y＆V4	Y	3
Male	58	Thrombectomy with Stent Retriever	8	Ⅲ-3	Y＆V4	Y	10	Rectal cancer
Male	62	Thrombectomy with Stent Retriever+Thrombus Aspiration	8	Ⅲ-3	Y＆V4	Y	1	Hemodialysis
Male	70	Thrombectomy with Stent Retriever	7	Ⅲ-3	Y＆V4	Y	12	Atrial fibrillation
Male	64	Thrombectomy with Stent Retriever+Vertebral Artery Balloon Angioplasty with Stent Placement	8	Ⅳ-2	Y＆Extracranial VA（V1-V3）	N＆Vascular dissection	26~1
Male	62	Thrombectomy with Stent Retriever+Vertebral Artery Balloon Angioplasty with Stent Placement	7	Ⅳ-2	Y＆Extracranial VA	Y	6
Male	73	Thrombectomy with Stent Retriever+Vertebral Artery Balloon Angioplasty with Stent Placement	6	Ⅳ-2	Y＆Extracranial VA	Y	4
Male	54	Thrombectomy with Stent Retriever+Vertebral Artery Balloon Angioplasty with Stent Placement	6	Ⅳ-2	Y＆Extracranial VA→Distal BA	Y	1
Male	54	Thrombectomy with Stent Retriever	6	Ⅳ-2	Y＆Extracranial VA→Distal BA	Y	12
Female	73	Thrombectomy with Stent Retriever+ Vertebral Artery Balloon Angioplasty with Stent Placement	6	Ⅳ-2	Y＆Extracranial VA	Y	21
Male	87	Thrombectomy with Stent Retriever+ Vertebral Artery Balloon Angioplasty with Stent Placement	6	Ⅳ-2→Ⅰ	Y＆Extracranial VA→Distal BA	Y	2
Female	68	Thrombectomy with Stent Retriever	1	A-2	Y＆Distal middle cerebral artery（M1）	N＆Thrombotic stroke	6
Male	57	Thrombectomy with Stent Retriever+MCA Balloon Angioplasty with Stent Placement	2	A-2	N＆Mid-proximal M1	Y	5
Male	42	Arterial Thrombolysis+MCA Balloon Angioplasty	1	A-2	Y＆Distal M1	Y	12
Male	48	Thrombectomy with Stent Retriever	1	A-2	Y＆Distal M1	Y	2
Female	54	Thrombectomy with Stent Retriever	1	A-2	Y＆Distal M1	Y	5
Male	52	Thrombus Aspiration+Artery Balloon Angioplasty with Stent Placement	1	A-2	Y＆Distal M1	Y	8
Male	68	Arterial Thrombolysis+Thrombectomy with Stent Retriever	1	A-2	Y＆Distal M1	Y	5
Female	73	Thrombectomy with Stent Retriever	1	A-2	Y＆Distal M1	Y	3	Orthopedic surgery
Male	62	Arterial Thrombolysis+Thrombectomy with Stent Retriever	1	A-2	Y＆Distal M1	Y	1
Male	49	Thrombus Aspiration+Thrombectomy with Stent Retriever+Artery Balloon Angioplasty with Stent Placement	1	A-2	Y＆Distal M1	Y	6
Male	86	Thrombus Aspiration	1	A-2	Y＆Distal M1	Y	1
Male	41	Thrombus Aspiration+Thrombectomy with Stent Retriever+Artery Balloon Angioplasty with Stent Placement	1	A-2	Y＆Distal M1	Y	20～6	Hormone use
Male	68	Arterial Thrombolysis+MCA Balloon Angioplasty	1	A-2	Y＆Distal M1	Y	6
Male	38	Thrombectomy with Stent Retriever	1	A-2	Y＆Distal M1	Y	6
Male	78	Thrombectomy with Stent Retriever	1	A-3	Y＆Distal M1	Y	1.5	Atrial fibrillation
Female	77	Thrombus Aspiration	1	A-3	Y＆Distal M1	Y	1	Atrial fibrillation
Male	60	Arterial Thrombolysis+Thrombectomy with Stent Retriever	MRA shows no abnormalities	A-3	Y＆Distal(M2-M3)	Y	4	Mitral valve insufficiency
Male	70	Thrombectomy with Stent Retriever	1	A-3	Y＆Distal M1	Y	0.5	Atrial fibrillation
Male	73	Thrombectomy with Stent Retriever	1	A-3	Y＆Distal M1	Y	4	Thyroid cancer surgery
Female	68	Thrombectomy with Stent Retriever+Artery Angioplasty with Stent Placement	1	A-3	Y＆Distal M1	Y	2	Atrial fibrillation/breast cancer
Male	83	Arterial Thrombolysis	1	A-3	Y＆Distal M1	Y	2	Atrial fibrillation
Male	76	Thrombus Aspiration	1	A-3	Y＆Distal M1	Y	0.5	Leukemia
Male	78	Thrombectomy with Stent Retriever	1	A-3	Y＆Distal M1	Y	1	Acute Congestive Heart Failure/malignant tumor
Male	58	Thrombectomy with Stent Retriever	1	A-3	Y＆Distal M1	Y	5	Atrial fibrillation
Male	65	Thrombectomy with Stent Retriever+Artery Balloon Angioplasty	1	A-3	Y＆Distal M1	Y	1	Myocardial infarction/Arrhythmia
Male	58	Thrombus Aspiration+Thrombectomy with Stent Retriever	1	A-3	Y＆Distal M1	Y	3	Atrial fibrillation
Female	74	Arterial Thrombolysis	1	A-3	Y＆Distal M1	Y	12	Bedridden after surgery/Multiple intracranial infarctions
Female	67	Thrombectomy with Stent Retriever+Artery Angioplasty with Stent Placement	1	A-3	Y＆Distal M1	Y	2	Atrial fibrillation
Male	62	Thrombectomy with Stent Retriever	1	A-3	Y＆Distal M1	Y	6	Atrial fibrillation
Female	84	Thrombectomy with Stent Retriever	1	A-3	Y＆Distal M1	Y	1	Atrial fibrillation
Male	30	Thrombus Aspiration	1	A-3	Y＆Distal M1	Y	5	Unknown source of embolus
Male	52	Thrombectomy with Stent Retriever	1	A-3	Y＆Distal M1	Y	5	Atrial fibrillation
Female	91	Thrombectomy with Stent Retriever	1	A-3	Y＆Distal M1	Y	4	Atrial fibrillation
Male	71	Thrombectomy with Stent Retriever	1	B-2	Y＆Mid-proximal M1	N＆Thrombotic stroke	0.3
Male	66	Thrombus Aspiration	3	B-2	N＆Intracranial ICA→Distal M1	N＆Thrombotic stroke	4	Postoperative myocardial infarction bypass surgery
Male	60	Thrombus Aspiration+Thrombectomy with Stent Retriever	1	B-2	Y＆Mid-proximal M1	N＆Thrombotic stroke	3
Male	39	Thrombectomy with Stent Retriever	1	B-2	Y＆Mid-proximal M1	N＆Thrombotic stroke	6	Glioma surgery
Male	31	Thrombectomy with Stent Retriever+ Artery Balloon Angioplasty	1	B-2	Y＆Mid-proximal M1	Y	9
Female	82	Thrombectomy with Stent Retriever+Artery Balloon Angioplasty with Stent Placement	2	B-2	Y＆Mid-proximal M1	Y	2
Male	56	Thrombectomy with Stent Retriever+Artery Balloon Angioplasty	2	B-2	Y＆Mid-proximal M1	Y	24
Male	40	Thrombectomy with Stent Retriever+Artery Balloon Angioplasty with Stent Placement	2	B-2	Y＆Mid-proximal M1	Y	5
Female	53	Arterial Thrombolysis+Artery Balloon Angioplasty with Stent Placement	2	B-2	Y＆Mid-proximal M1	Y	24
Female	54	Thrombectomy with Stent Retriever+Artery Balloon Angioplasty with Stent Placement	2	B-2	Y＆Mid-proximal M1	Y	8
Female	51	Thrombectomy with Stent Retriever	1	B-2	Y＆Mid-proximal M1	Y	5
Female	51	Thrombectomy with Stent Retriever+Artery Angioplasty with Stent Placement	1	B-2	Y＆Mid-proximal M1	Y	1
Male	57	Thrombectomy with Stent Retriever+Artery Balloon Angioplasty with Stent Placement	2	B-2	Y＆Mid-proximal M1	Y
Female	65	Thrombectomy with Stent Retriever+Thrombus Aspiration	2	B-2	Y＆Mid-proximal M1	Y	3
Male	41	Thrombectomy with Stent Retriever+Artery Angioplasty with Stent Placement	2	B-2	Y＆Mid-proximal M1	Y	7
Male	70	Thrombectomy with Stent Retriever	2	B-2	Y＆Mid-proximal M1	Y	7
Female	71	Thrombectomy with Stent Retriever	1	B-2	Y＆Mid-proximal M1	Y	24
Male	46	Thrombectomy with Stent Retriever+Artery Balloon Angioplasty	2	B-2	Y＆Mid-proximal M1	Y	4
Male	45	Thrombectomy with Stent Retriever+Artery Angioplasty with Stent Placement	1	B-2	Y＆Mid-proximal M1	Y	24
Male	65	Thrombectomy with Stent Retriever	1	B-2	Y＆Mid-proximal M1	Y	2	Atrial fibrillation
Male	29	Thrombectomy with Stent Retriever+Artery Balloon Angioplasty	1	B-2	Y＆Mid-proximal M1	Y	16
Male	54	Thrombectomy with Stent Retriever+Artery Balloon Angioplasty with Stent Placement	1	B-2	Y＆Mid-proximal M1	Y	5
Male	58	Thrombectomy with Stent Retriever	3	B-2	Y＆Mid-proximal M1	Y	12
Male	43	Thrombectomy with Stent Retriever+Artery Balloon Angioplasty+Arterial Thrombolysis+Thrombus Aspiration	2	B-2	Y＆Mid-proximal M1	Y	7.5
Male	39	Arterial Thrombolysis+Thrombectomy with Stent Retriever	1	B-2	Y＆Mid-proximal M1	Y	10
Male	70	Thrombectomy with Stent Retriever+Thrombus Aspiration	3	B-2	Y＆Mid-proximal M1	Y	8
Male	73	Thrombus Aspiration	1	B-3	Y＆Mid-proximal M1	Y	1	Atrial fibrillation
Female	78	Thrombus Aspiration	1	B-3	Y＆Mid-proximal M1	Y	4.5	Atrial fibrillation
Female	70	Thrombectomy with Stent Retriever	1	B-3	Y＆Mid-proximal M1	Y	1	Atrial fibrillation
Female	72	Thrombus Aspiration	3	B-3	Y＆Mid-proximal M1	Y	3	Atrial fibrillation
Female	67	Thrombectomy with Stent Retriever	2	B-3	Y＆Mid-proximal M1	Y	2	lung cancer metastasis
Female	66	Thrombectomy with Stent Retriever	3	B-3	Y＆Mid-proximal M1	Y	4.5	Atrial fibrillation
Female	73	Thrombectomy with Stent Retriever	2	B-3	Y＆Mid-proximal M1	Y	3	Atrial fibrillation
Female	72	Thrombectomy with Stent Retriever	2	B-3	Y＆Mid-proximal M1	Y	3	Atrial fibrillation
Female	83	Thrombus Aspiration	1	B-3	Y＆Mid-proximal M1	Y	24	Bacteremia
Male	79	Thrombectomy with Stent Retriever+Thrombus Aspiration	1	B-3	Y＆Mid-proximal M1	Y	1	bladder cancer/ atrial flutter
Female	64	Thrombectomy with Stent Retriever	1	B-3	Y＆Mid-proximal M1	Y	4.5	Atrial fibrillation
Female	83	Thrombectomy with Stent Retriever	2	B-3	Y＆Mid-proximal M1	Y	0.5	Atrial fibrillation
Female	78	Thrombectomy with Stent Retriever+Artery Balloon Angioplasty	3	B-3	N＆Intracranial ICA	Y	1.5	Atrial fibrillation
Male	85	Thrombectomy with Stent Retriever	2	B-3	Y＆Mid-proximal M1	Y	10	Atrial fibrillation
Female	79	Thrombectomy with Stent Retriever	3	B-3	Y＆Mid-proximal M1	Y	5	Atrial fibrillation
Male	77	Thrombectomy with Stent Retriever	1	B-3	Y＆Mid-proximal M1	Y	8	Atrial fibrillation
Female	67	Thrombectomy with Stent Retriever+Thrombus Aspiration	1	B-3	Y＆Mid-proximal M1	Y	2	Atrial fibrillation
Male	56	Thrombectomy with Stent Retriever	2	B-3	Y＆Mid-proximal M1	Y	1	Atrial fibrillation
Female	78	Thrombectomy with Stent Retriever	2	B-3	Y＆Mid-proximal M1	Y	10	Atrial fibrillation
Male	72	Thrombus Aspiration	1	B-3	Y＆Mid-proximal M1	Y	3	Atrial fibrillation
Female	78	Thrombectomy with Stent Retriever	1	B-3	Y＆Mid-proximal M1	Y	2	Atrial fibrillation
Female	77	Thrombectomy with Stent Retriever+Artery Angioplasty with Stent Placement	5+8	C+Ⅲ-3	Y＆Intracranial ICA+V4	Y	1	Atrial fibrillation
Female	59	Thrombectomy with Stent Retriever+Artery Balloon Angioplasty with Stent Placement	4	C-2	Y＆Intracranial ICA	Y	9	Orthopedic surgery
Male	33	Thrombectomy with Stent Retriever+Artery Balloon Angioplasty with Stent Placement	4	C-2	Y＆Intracranial ICA	Y	22
Male	49	Thrombectomy with Stent Retriever+Artery Balloon Angioplasty with Stent Placement	4	C-2	Y＆Intracranial ICA→Mid-proximal M1	Y	48
Male	59	Thrombectomy with Stent Retriever+Artery Balloon Angioplasty with Stent Placement	5	C-2	Y＆Intracranial ICA	Y	3
Female	53	Thrombectomy with Stent Retriever+Artery Angioplasty with Stent Placement	5	C-2	Y＆Intracranial ICA	Y	4.5
Male	50	DSA	5	C-2	Y＆Intracranial ICA	Y	19
Male	57	Thrombectomy with Stent Retriever	5	C-2	N＆The entire segment of ICA	N＆Thrombotic stroke	6	Unknown source of embolus
Female	50	Thrombectomy with Stent Retriever+Thrombus Aspiration	1	C-3	N＆Mid-proximal M1	Y	4	Atrial fibrillation
Male	69	Thrombectomy with Stent Retriever+Thrombus Aspiration	5	C-3	Y＆Intracranial ICA	Y	5	Atrial fibrillation
Male	54	Thrombectomy with Stent Retriever	5	C-3	Y＆Intracranial ICA	Y	6	Atrial fibrillation
Female	77	Thrombectomy with Stent Retriever	3	C-3	Y＆Intracranial ICA	Y	2	Atrial fibrillation
Female	78	Thrombus Aspiration	5	C-3	Y＆Intracranial ICA→Mid-proximal M1	Y	5	Atrial fibrillation
Female	83	Thrombectomy with Stent Retriever	5	C-3	N＆The entire segment of ICA	Y	1	Atrial fibrillation
Male	68	Thrombectomy with Stent Retriever	5	C-3	Y＆Intracranial ICA	Y	1	Atrial fibrillation
Female	76	Thrombus Aspiration	5	C-3	N＆The entire segment of ICA	Y	2	Atrial fibrillation
Male	57	Thrombectomy with Stent Retriever+Thrombus Aspiration	5	C-3	Y＆Intracranial ICA	Y	2.5	Atrial fibrillation
Male	65	Thrombectomy with Stent Retriever+Thrombus Aspiration	5	C-3	N＆The entire segment of ICA	Y	1	Atrial fibrillation
Male	73	Thrombus Aspiration	5	C-3	Y＆Intracranial ICA	Y	5	Atrial fibrillation
Female	67	Thrombus Aspiration	5	C-3	Y＆Intracranial ICA	Y	3	Atrial fibrillation
Female	52	Thrombectomy with Stent Retriever	3	C-3	Y＆Intracranial ICA	Y	1	cancer chemotherapy
Female	85	Thrombectomy with Stent Retriever	4	C-3	Y＆Intracranial ICA	Y	0.5	Atrial fibrillation
Female	67	Thrombus Aspiration+Artery Balloon Angioplasty with Stent Placement	4	C-3	Y＆Intracranial ICA	Y	12	surgery for rectal cancer
Female	72	Thrombectomy with Stent Retriever+Thrombus Aspiration	5	C-3	Y＆Intracranial ICA	Y	6	mitral valve replacement
Male	72	Thrombectomy with Stent Retriever	5	C-3	Y＆Intracranial ICA	Y	7.5	Atrial fibrillation
Female	69	Thrombectomy with Stent Retriever	5	C-3	Y＆Intracranial ICA	Y	5	Atrial fibrillation
Female	59	Thrombectomy with Stent Retriever	3	C-3	Y＆Intracranial ICA	Y	8	Atrial fibrillation
Male	70	Thrombectomy with Stent Retriever	3	C-3	Y＆Intracranial ICA	Y	3	Atrial fibrillation
Female	80	Thrombectomy with Stent Retriever	4	C-3	Y＆Intracranial ICA→Distal M1	Y	4	Atrial fibrillation/mitral valve replacement
Male	32	Thrombus Aspiration	3	C-3	Y＆Intracranial ICA→Mid-proximal M1	Y	2？	Atrial fibrillation
Female	52	Thrombectomy with Stent Retriever+Thrombus Aspiration	5	D-3（A）	N＆Intracranial ICA→Distal M1	Y	0.5	chemotherapy for lymphoma
Female	60	Thrombectomy with Stent Retriever+Artery Angioplasty with Stent Placement	5	D/B-3	Y＆Extracranial ICA →Mid-proximal M1	Y	7	Atrial fibrillation
Male	79	Thrombectomy with Stent Retriever	5	D/B-3	Y＆Extracranial ICA →Mid-proximal M1	Y	9	Atrial fibrillation
Male	66	Thrombectomy with Stent Retriever+Artery Angioplasty with Stent Placement	4	D-2	Y＆Extracranial ICA	Y	6
Male	45	Thrombectomy with Stent Retriever	5	D-2	Y＆Extracranial ICA	Y	2
Male	57	Thrombus Aspiration+Artery Balloon Angioplasty with Stent Placement	4	D-2	Y＆Extracranial ICA	Y	17
Male	87	Thrombectomy with Stent Retriever+Artery Balloon Angioplasty with Stent Placement	4	D-2	Y＆Extracranial ICA→Distal M1	Y	4
Female	52	Thrombectomy with Stent Retriever	4	D-2	Y＆Extracranial ICA	Y	0.5
Male	69	Thrombectomy with Stent Retriever+Artery Balloon Angioplasty with Stent Placement	5	D-2	Y＆Extracranial ICA→Distal M1	Y	6
Male	49	Thrombectomy with Stent Retriever+Artery Balloon Angioplasty with Stent Placement	5	D-2	Y＆Extracranial ICA	Y	3
Male	60	Thrombectomy with Stent Retriever+Artery Balloon Angioplasty with Stent Placement	5	D-2	Y＆Extracranial ICA→Distal M1	Y	4
Male	55	Thrombectomy with Stent Retriever+Artery Angioplasty with Stent Placement	3	D-2	Y＆Extracranial ICA →Mid-proximal M1	Y	12
Female	72	Thrombectomy with Stent Retriever+Artery Balloon Angioplasty with Stent Placement	5	D-2	Y＆Extracranial ICA	Y	X
Female	73	Thrombus Aspiration	4	D-2	Y＆Extracranial ICA	Y	7
Male	80	Thrombus Aspiration+Artery Balloon Angioplasty with Stent Placement	5	D-2	Y＆Extracranial ICA →Mid-proximal M1	Y	after anesthesia recovery
Male	60	Thrombectomy with Stent Retriever+Artery Balloon Angioplasty	5	D-2	Y＆Extracranial ICA →Mid-proximal M1	Y	2
Male	76	Thrombectomy with Stent Retriever+Artery Balloon Angioplasty with Stent Placement	4	D-2	Y＆Extracranial ICA→Distal M1	Y	1
Male	62	Thrombectomy with Stent Retriever+Artery Angioplasty with Stent Placement	4	D-2	Y＆Extracranial ICA	Y	24
Male	71	Thrombus Aspiration+Artery Balloon Angioplasty with Stent Placement	5	D-2	Y＆Extracranial ICA→Distal M1	Y	1
Male	68	Thrombectomy with Stent Retriever+Artery Balloon Angioplasty with Stent Placement	4	D-2	Y＆Extracranial ICA→Distal M1	Y	3
Male	66	Thrombectomy with Stent Retriever	5	D-2	Y＆Extracranial ICA →Mid-proximal M1	Y	8
Female	74	Thrombectomy with Stent Retriever	5	D-2	N＆Intracranial ICA	Y	0.5
Male	62	Thrombectomy with Stent Retriever+Artery Balloon Angioplasty	4	D-2→A	Y＆Extracranial ICA→Distal M1	Y	7
Male	68	Thrombectomy with Stent Retriever+Artery Balloon Angioplasty with Stent Placement	5	D-2→A	Y＆Extracranial ICA	Y	5
Male	69	Thrombectomy with Stent Retriever+Artery Balloon Angioplasty with Stent Placement	5	D-2→A	Y＆Extracranial ICA→Distal M1	Y	3
Male	60	Thrombus Aspiration	5	D-2→B	Y＆Extracranial ICA→Mid-proximal M1	N＆Thrombotic stroke	5	Unknown source of embolus
Male	71	Thrombectomy with Stent Retriever+Artery Angioplasty with Stent Placement	5	D-2→B	Y＆Extracranial ICA →Mid-proximal M1	Y	0.5
Female	73	Thrombectomy with Stent Retriever+Thrombus Aspiration+Artery Balloon Angioplasty with Stent Placement	5	D-2→B	Y＆Extracranial ICA →Mid-proximal M1	Y	2
Male	62	Thrombectomy with Stent Retriever+Artery Angioplasty with Stent Placement	5	D-2→B	Y＆Extracranial ICA →Mid-proximal M1	Y	4
Male	66	Thrombectomy with Stent Retriever+Artery Balloon Angioplasty with Stent Placement	5	D-2→B	Y＆Extracranial ICA →Mid-proximal M1	Y	11
Female	79	Thrombectomy with Stent Retriever	4	D-3	Y＆Extracranial ICA →Mid-proximal M1	Y	0.5	Atrial fibrillation
Female	83	Thrombectomy with Stent Retriever+Artery Balloon Angioplasty with Stent Placement	5	D-3→B	Y＆Extracranial ICA →Mid-proximal M1	Y	3	atrial flutter
Male	86	Thrombectomy with Stent Retriever	5	D-3→B	Y＆Extracranial ICA →Mid-proximal M1	Y	1	Atrial fibrillation
Male	73	Thrombectomy with Stent Retriever+Artery Angioplasty with Stent Placement	5	D-4	Y＆Extracranial ICA	Y	48	traumatic injury
Male	62	Thrombectomy with Stent Retriever	5	D-4	Y＆Extracranial ICA→Distal M1	Y	6	Caused by cerebrovascular angiography
Male	62	Thrombus Aspiration+Artery Balloon Angioplasty with Stent Placement	4	D-4	Y＆Extracranial ICA	Y	48	onset during the process of straining to have a bowel movement
Female	77	Thrombectomy with Stent Retriever+Artery Angioplasty with Stent Placement	5+8	C+Ⅲ-3	Y＆Intracranial ICA+V4	Y	1	Atrial fibrillation

## Sheet: Sheet2
性别	年龄	高血压	糖尿病	高脂血症	吸烟病史	冠心病史	卒中病史	特殊病史	DWI位置-性质分型
女	71	1	1						B-2
女	68							房颤/乳腺癌病史	A-3
女	51	1					1		B-2
女	78	1	1	1			1	房颤/乳腺癌病史	B-3
女	54			1					A-2
男	62	1		1					A-2
男	52			1					A-2
男	29	1			1				B-2
男	39			1					B-2
男	58	1				1	1	房颤	A-3
男	38				1				A-2
男	39				1			胶质瘤术后	B-2
男	48			1	1				A-2
男	54	1	1		1		1		B-2
男	65					1		心梗/房颤	A-3
男	78	1	1					房颤	A-3
女	70	1						房颤	B-3
女	83	1					1	菌血症，卧床	B-3
女	74	1				1		术后卧床、颅内多发梗死	A-3
男	70	1				1		房颤	A-3
女	67	1					1	房颤	A-3
男	77					1		房颤	B-3
女	50						1	房颤	C-3
男	30							栓子来源不明	A-3（多发梗死）
男	31				1				B-2
男	85	1				1		房颤	B-3
男	46				1				B-2
男	57				1				A-2
男	43	1			1				B-2
男	40		1		1				B-2
男	56	1			1	1	1	房颤	B-3
男	56				1	1			B-2
女	72							房颤	B-3
男	76	1	1	1					D-2
男	62				1				D-2→A
男	49	1	1		1		1		C-2
男	62				1				D-2
女	59	1						全麻骨科手术后	C-2
男	73				1			房颤	C-3
男	69	1							D-2
男	60	1				1			D-2
男	60		1		1		1		D-2
男	57	1			1			大量来源不明血栓	C-2（胚胎型大脑后，枕动脉和脉后梗死）
男	79					1		房颤	D/B-3
男	62							造影术后发病	D-4
女	60							房颤	D/B-3
女	67							房颤	C-3
女	76					1	1	房颤	C-3
女	83	1				1		房颤	C-3
男	54	1			1	1		房颤	C-3
女	83	1			1			房扑	D-3→B
男	60			1	1			来源不明栓子	D-2→B
男	62	1	1	1	1				D-2→B
男	68	1							D-2→A
男	69	1						房颤	C-3
女	53								C-2
男	71	1			1				D-2→B
女	73	1	1					外阴肿瘤	D-2→B
男	57	1			1			房颤	C-3
男	66	1	1						D-2→B
男	65							房颤	C-3
男	69	1							C-2→A
女	75	1	1					房颤/肺癌	Ⅰ-3
男	66	1							Ⅱ-2
男	53				1	1		房颤初诊	Ⅰ-3
男	87	1				1	1		Ⅳ-2→Ⅰ
男	73	1	1				1	房颤（区分Ⅰ和Ⅳ）	Ⅰ-3
男	58	1			1				Ⅲ-2
男	62	1	1		1		1		Ⅳ-2
男	50	1			1	1			Ⅱ-2
男	47				1	1			Ⅲ-2
男	34	1			1				Ⅲ-2
男	65				1	1			Ⅰ-3
男	55	1			1				Ⅲ-2
男	55	1					1		Ⅱ-2
女	55	1	1						Ⅲ-2
女	73	1					1	骨科手术后	A-2
男	68	1			1				A-2
男	52				1			房颤	A-3（上干）
男	58				1			房颤	A-3
女	91	1	1				1	房颤	A-3+大脑前
男	73	1	1					房颤	B-3
女	66	1	1				1	房颤	B-3
男	55				1				D-2
女	78	1				1	1	房颤	B-3
女	77							房颤/心脏瓣膜病	C+Ⅲ-3
男	54	1							Ⅳ-2
男	64	1				1			Ⅳ-4/3
男	73							甲状腺癌术后	A-3
男	76	1			1			白血病	A-3
男	60							房颤/二尖瓣关闭不全
男	86	1							A-2
男	41				1				A-2
男	45				1				B-2
男	62	1	1				1	房颤	A-3
男	78							肿瘤史/急性心衰	A-3
男	72							房颤	B-3
男	79							膀胱癌/房颤	B-3
女	51								B-2
男	71	1				1			B-2
男	49								A-2
男	68	1			1		1		A-2
男	42	1			1				A-2
女	64	1						房颤	B-3
女	77	1	1			1		房颤	A-3
男	60								B-2
女	78	1						房颤/胃癌	B-3
女	67	1	1					房颤	B-3
女	68	1				1			A-2
男	65				1			房颤	B-2
女	65								B-2
男	57	1			1				B-2
女	78							房颤（初诊）	B-3
女	54	1							B-2
女	83	1						房颤	B-3
男	41				1				B-2
女	82	1					1		B-2
女	53	1							B-2
男	70	1			1				B-2
女	67					1		肺癌转移	B-3
女	72	1	1					房颤	B-3
男	70	1	1			1		房颤	C-3
女	52							肿瘤化疗史	C-3
女	77	1	1					房颤	C-3
男	32				1			房颤	C-3（B）
男	70	1	1						B-2
男	66				1	1		心梗搭桥术后	B-2
女	79	1						房颤	B-3
女	59	1			1		1	房颤	C-3
男	57								D-2
男	33	1			1				C-2
男	66				1				D-2
女	85	1						房颤	C-3
男	62	1						解大便夹层	D-4（分水岭+皮层+病史/疼痛）
女	80							房颤/二尖瓣换瓣	C-3（A）
男	68				1				D-2（A）
女	67	1					1	直肠癌术后1月	C-3
女	73	1				1	1		D-2
男	87					1			D-2
女	79		1			1		房颤	D-3
女	52						1		D-2
男	86	1	1					房颤	D-3→B
女	52	1					1	淋巴瘤化疗	C（可疑梗死，时间短）-3（A）
男	49	1	1	1	1				D-2
男	73	1						外伤	D-4
女	72						1	二尖瓣换瓣	C-3
男	80					1			D-2
男	71		1			1			D-2
女	78	1	1					房颤	C-3
男	59	1			1				C-2
男	68	1						房颤	C-3
女	74	1	1						D-2
女	69	1	1			1	1	房颤	C-3
男	50	1	1	1					C-2
男	66	1					1		D-2（B）
男	72	1				1	1	房颤	C-3
男	45	1	1		1				D-2
女	72	1				1	1		D-2
男	54				1			肿瘤化疗史	Ⅰ-3
女	68	1							Ⅱ-2
女	73						1		Ⅳ-2
男	57	1			1				Ⅲ-2
女	80								Ⅰ-3	Ⅳ和Ⅰ怎么区别
男	53	1	1		1	1			Ⅰ-3
男	70	1		1	1		1	脑梗史	Ⅱ-2
男	63	1		1	1				Ⅱ-2
女	63	1					1		Ⅲ-2
男	45				1				Ⅱ-2
男	63	1	1						Ⅲ-2
女	75	1				1			Ⅰ-3
男	70	1	1			1	1	房颤	Ⅲ-3
男	58	1			1		1		Ⅲ-2
男	62	1					1	透析病人	Ⅲ-3
男	58	1			1			直肠癌病史	Ⅲ-3
女	78	1				1			Ⅲ-2
男	58	1	1						Ⅲ-2
女	73	1	1					房颤	B-3
男	58								B-2
男	73	1	1						Ⅳ-2
男	45			1	1				Ⅱ-2
女	84	1						房颤	A-3
男	83							房颤	A-3
男	54	1							Ⅳ-2
女	77							房颤/心脏瓣膜病	C+Ⅲ-3
		112	40	14	63	38	38
	63.7935
	13.0162
